# Supplementary material for: Semantic clustering analysis of E3-ubiquitin ligases in gastrointestinal tract defines genes ontology clusters with tissue expression patterns
Source: Springer Nature journal article supplement (doi:10.1186/s12876-022-02265-2), 2022-04-12

**Fig. S1** Workflow of semantic cluster analysis. The original qPCR data matrix is divided into 3 groups of samples according to their type of tissue. For each tissue combination, we performed statistical analysis to reveal two sets of genes: organ specific and general genes. Together with ontologies, the sem1R algorithm is run for each set of genes individually to induce a hypothesis describing specifics of organ specific genes over the general ones.

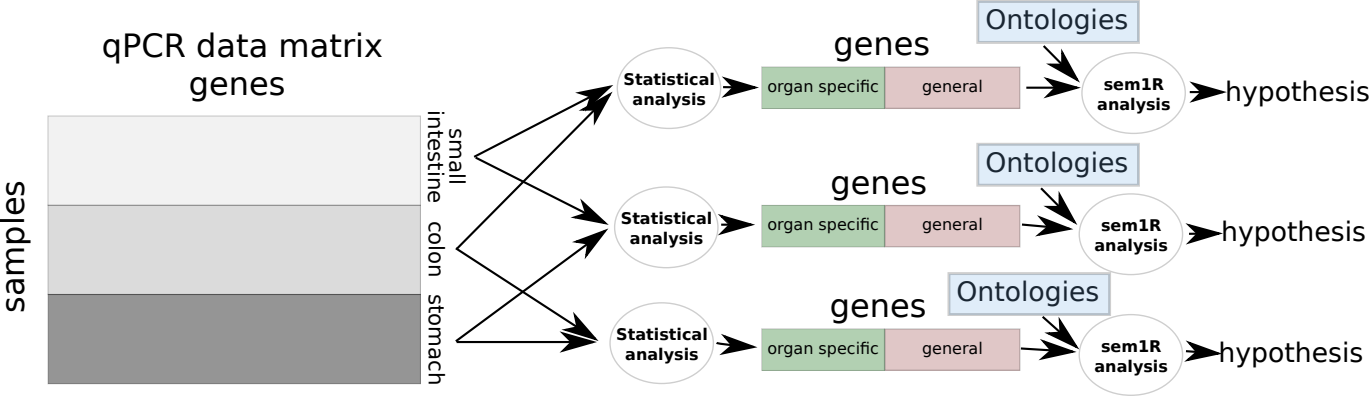

**Fig. S2** Heatmap of the differential expression of Ub-ligases and ubiquitination-related genes after induced epithelial damage.

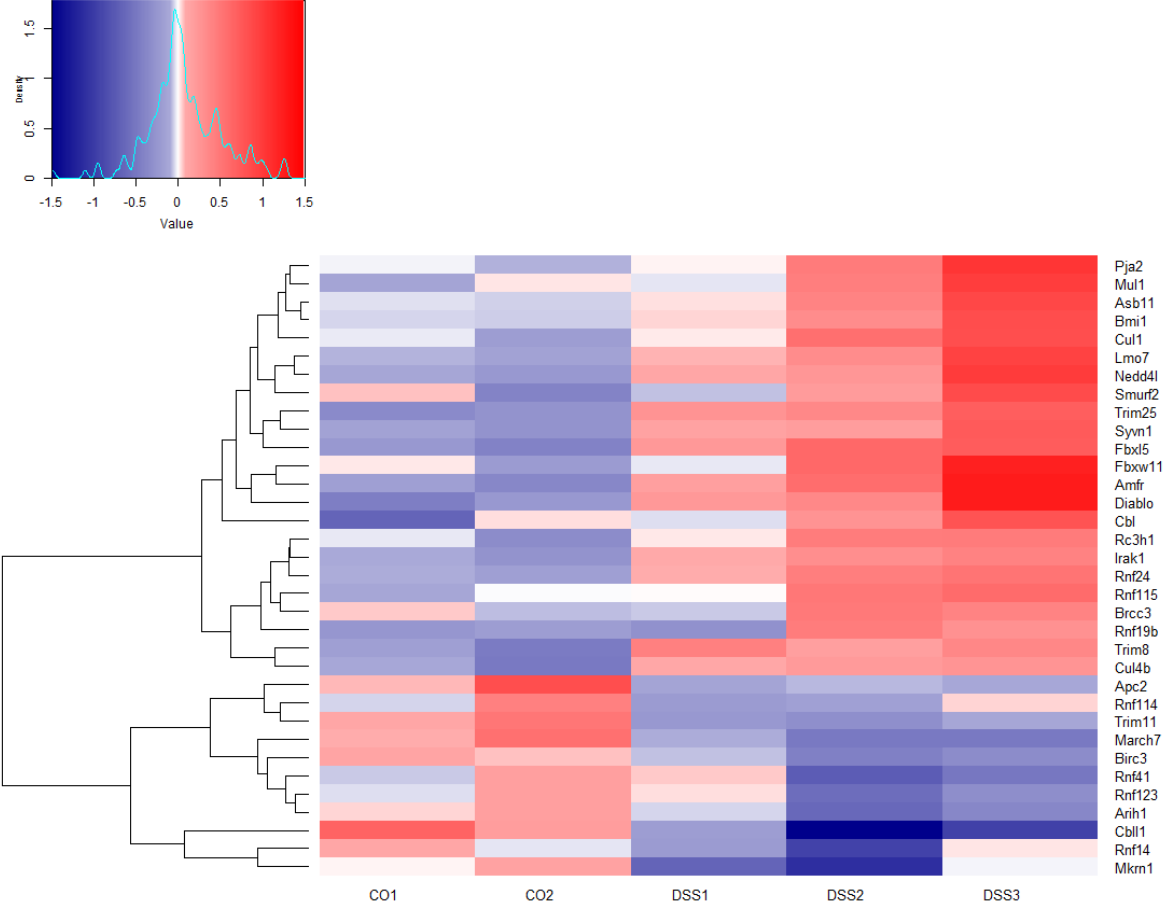

**Fig. S3** Differential expression of Ub-ligases and ubiquitination-related genes after induced epithelial damage.

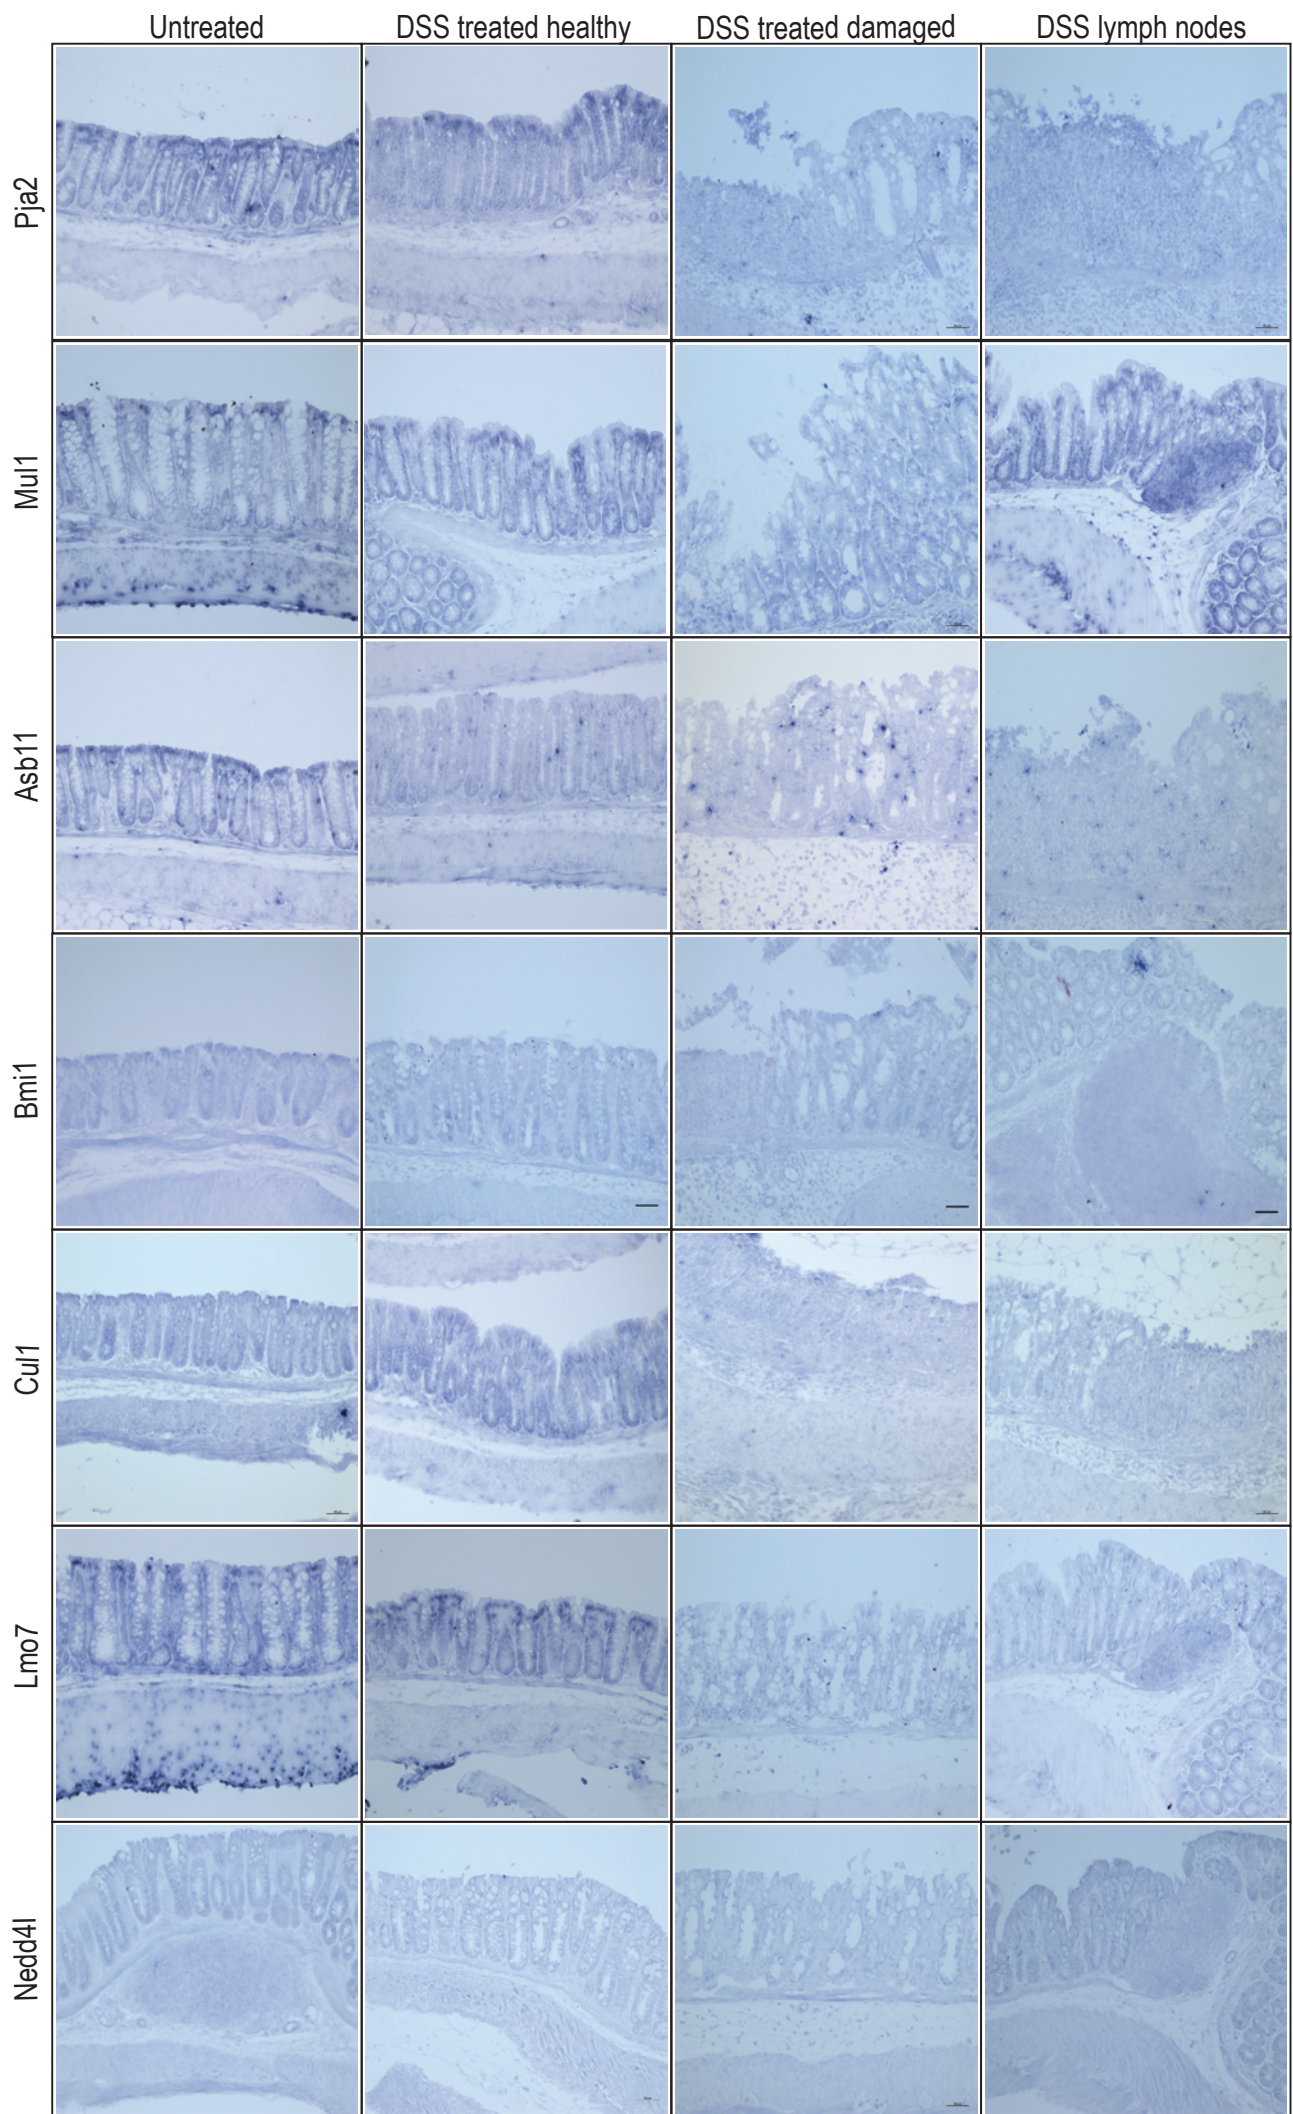

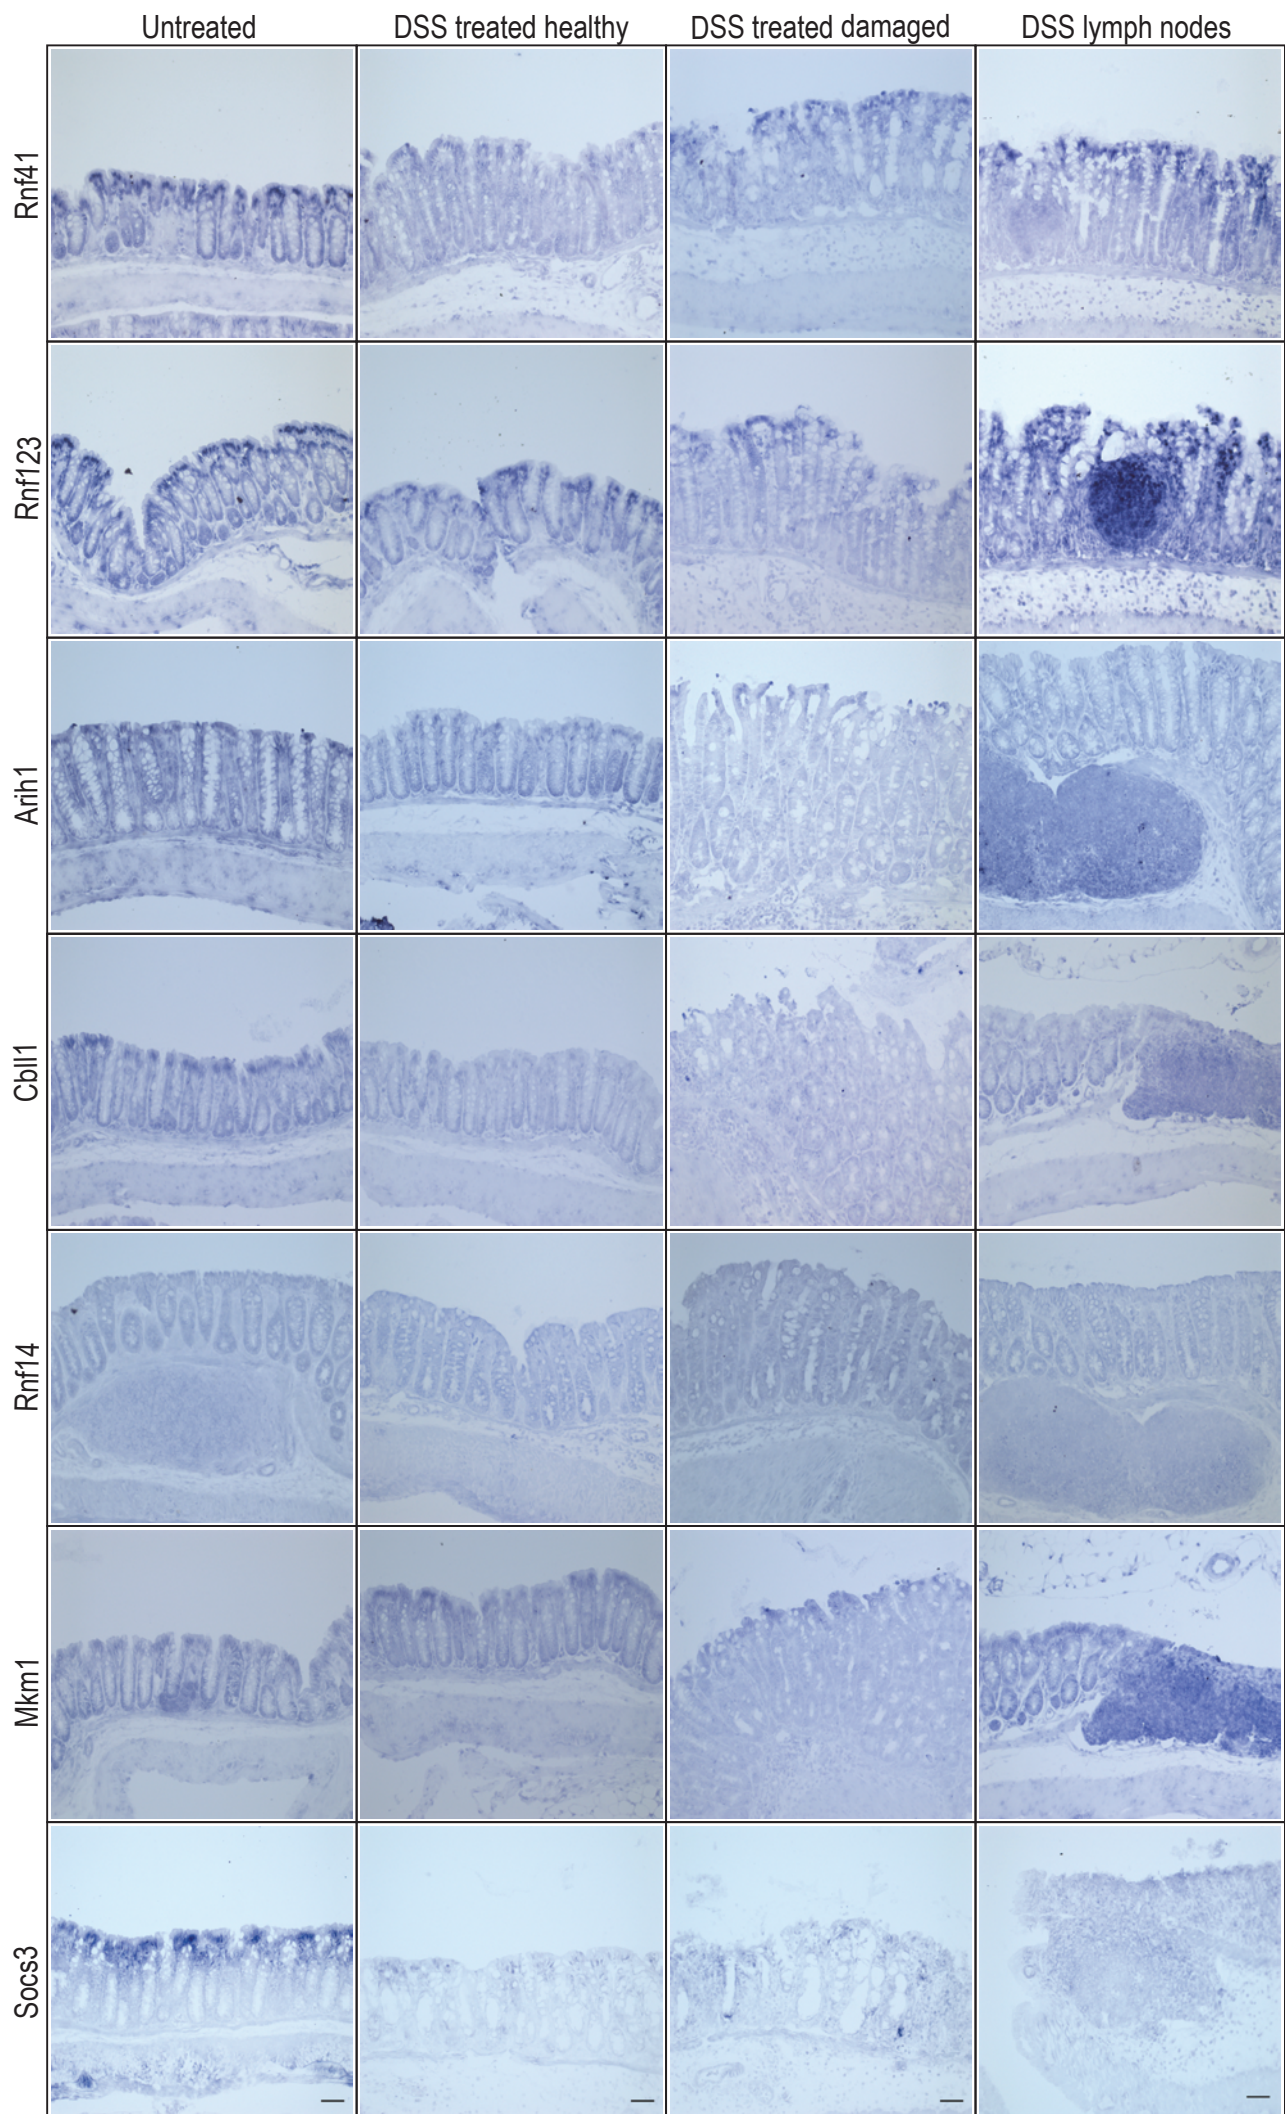

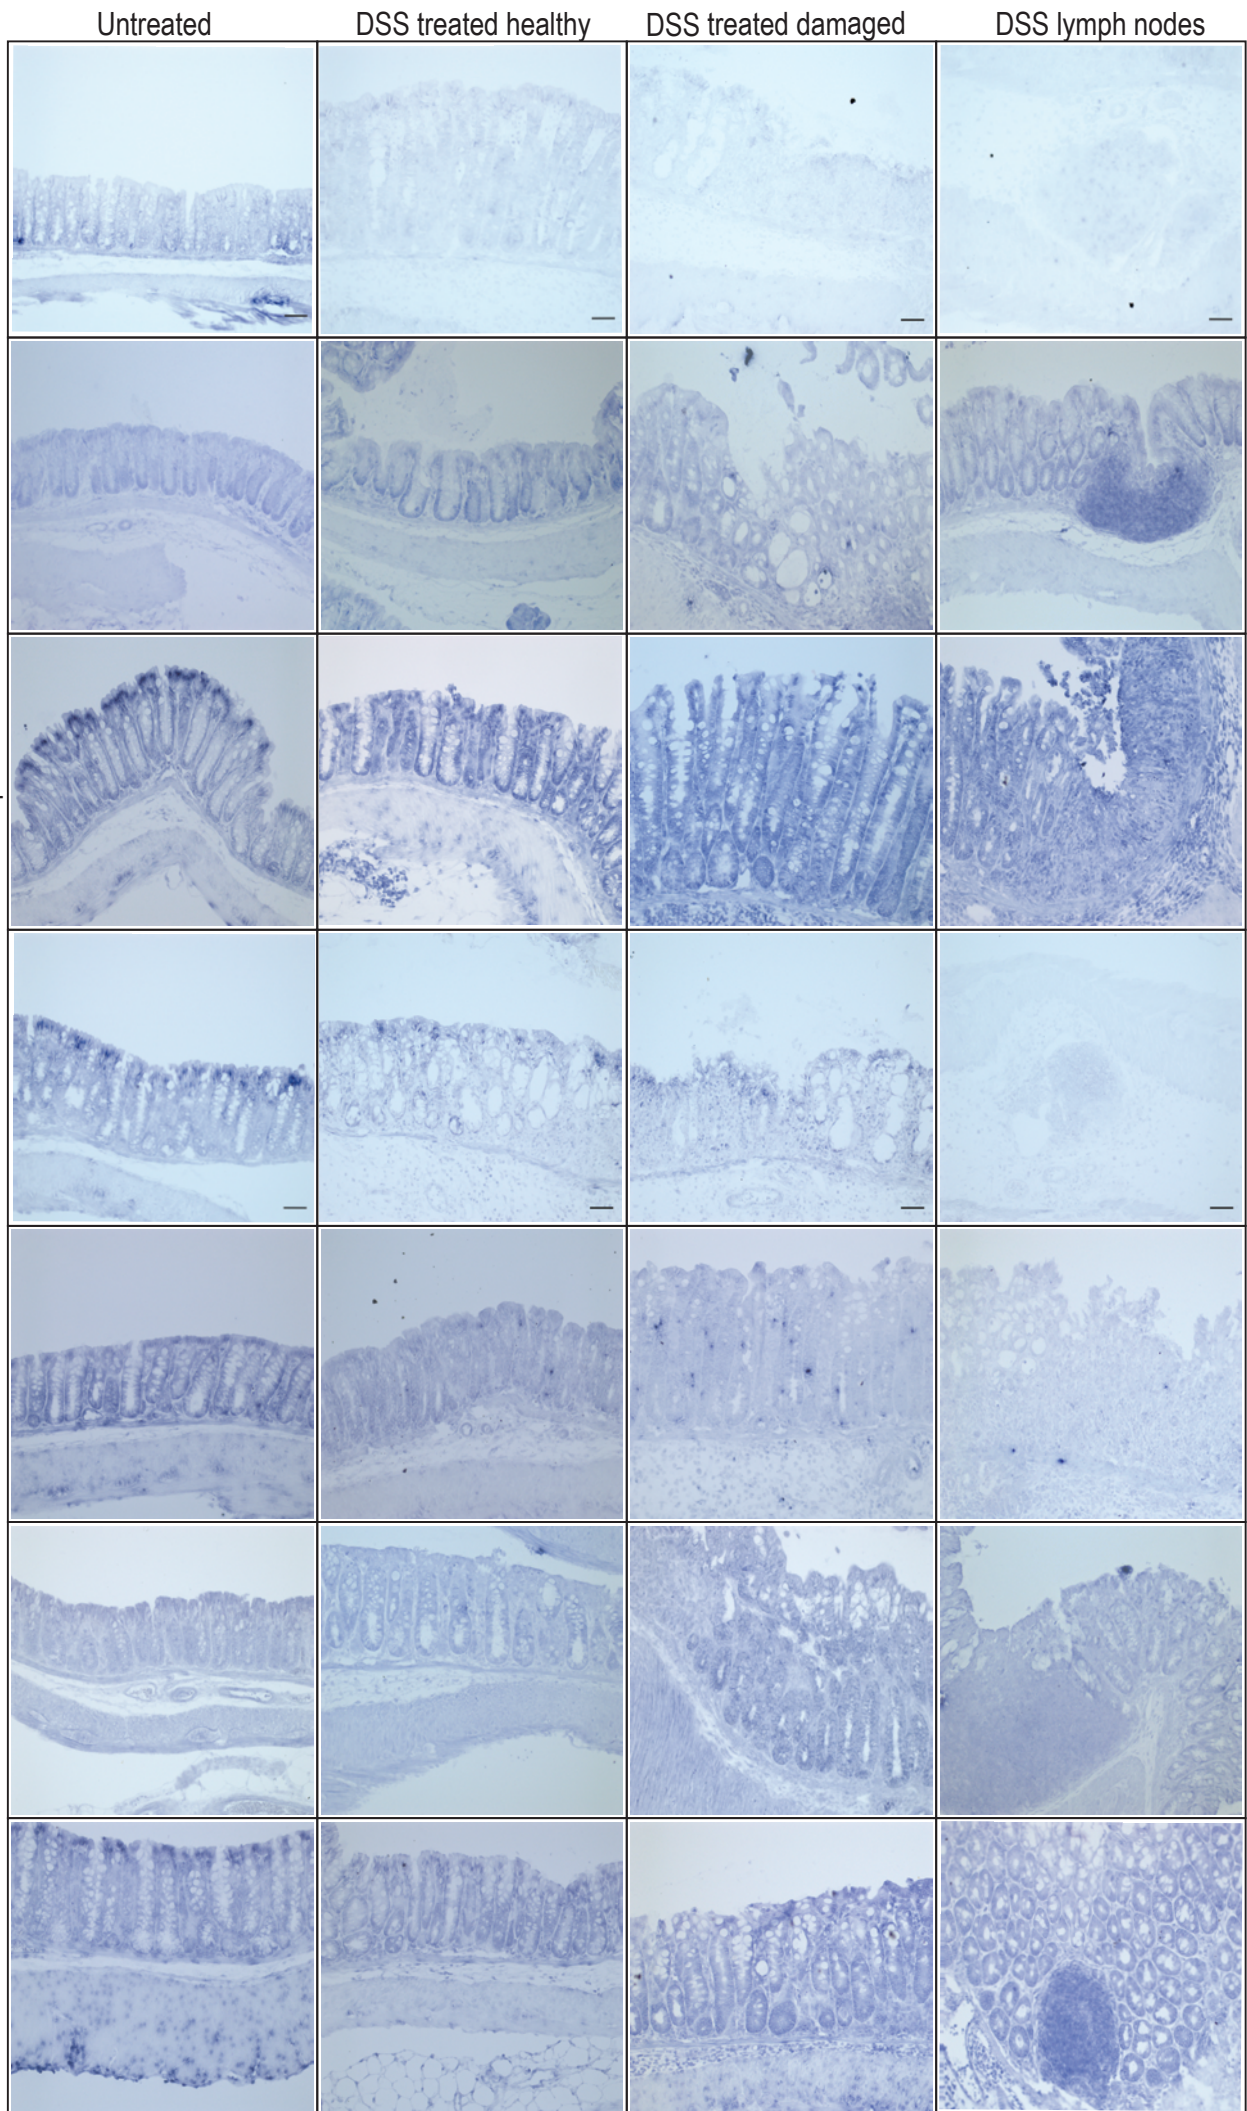

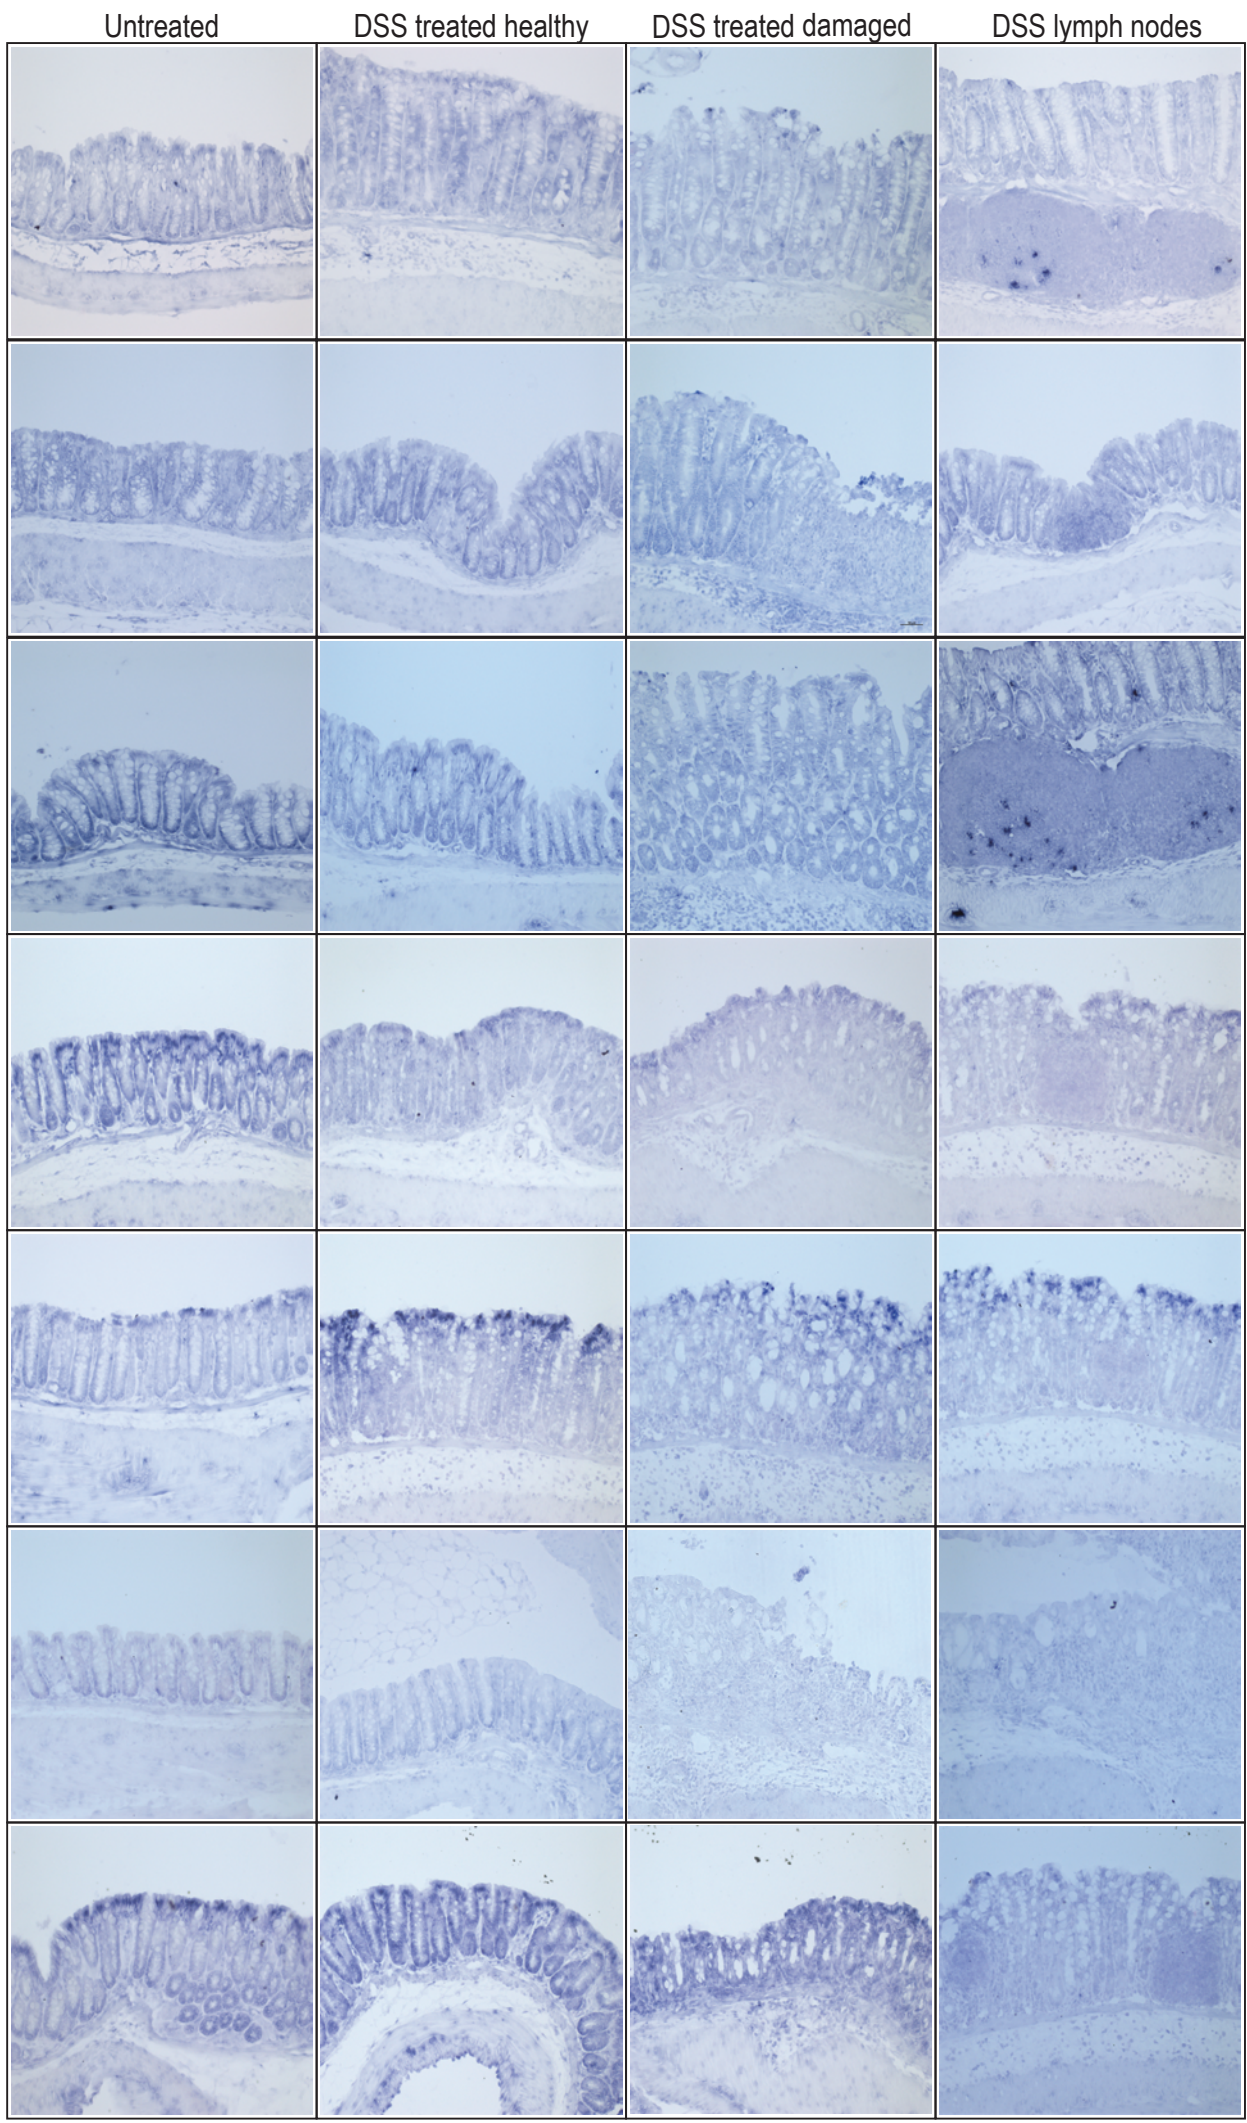



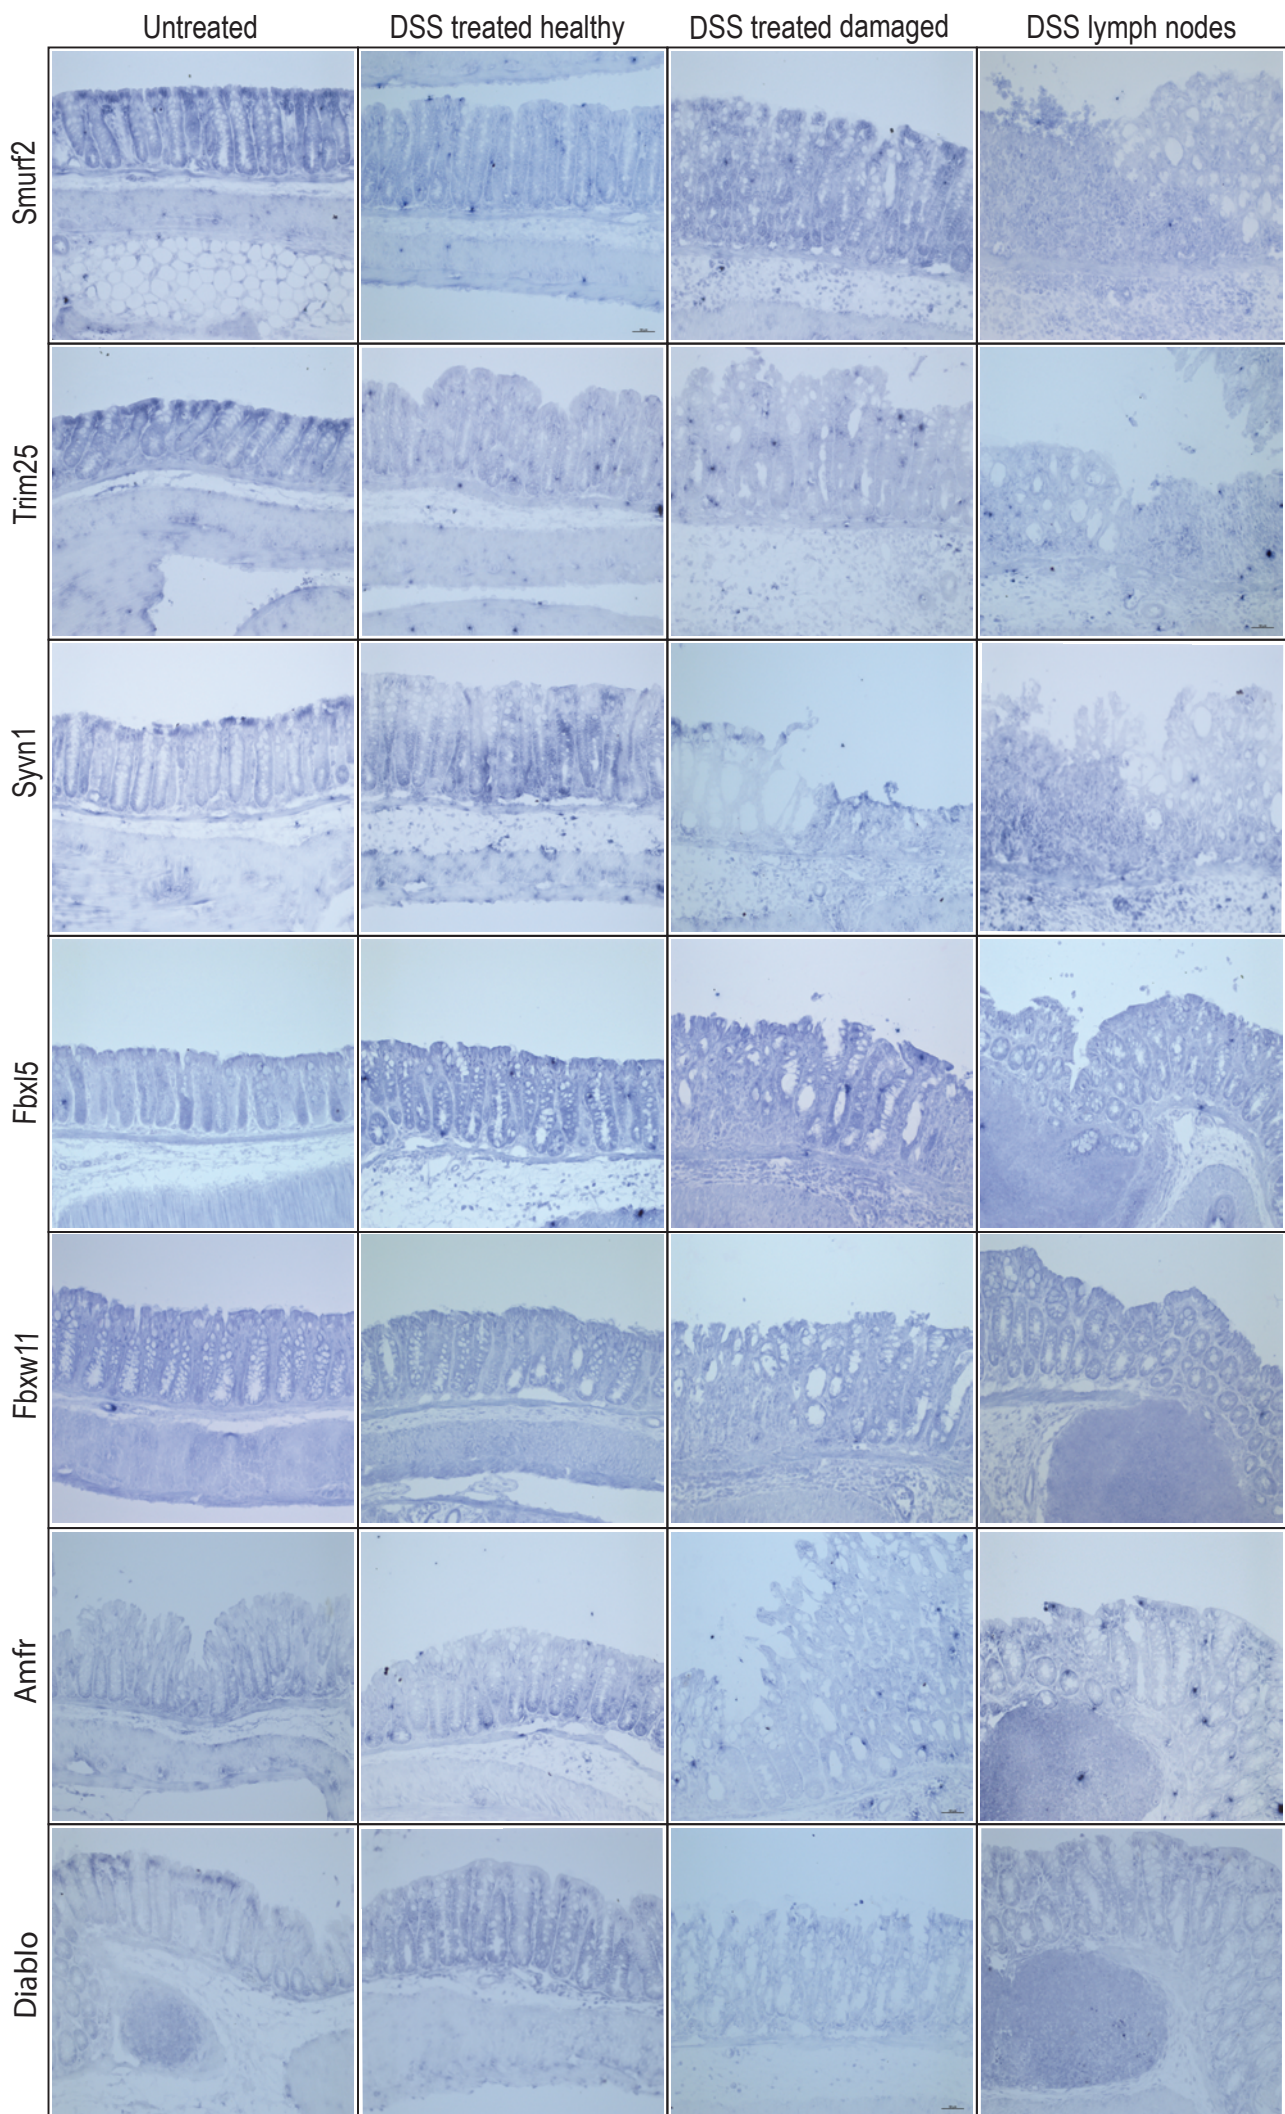

Supplement: MOESM5 [file 20305860]
